# Supplementary material
Source: publisher figshare collection journal article supplement (https://acs.figshare.com/ndownloader/files/4162759)
Supplement: Supplementary file 1 [file 4162759]

## **Bulk and Surface Excitons in Alloyed and Phase-Separated Zn–Mg–O Particulate Systems**

Huanjun Zhang<sup>1,†</sup>, Amir R. Gheisi<sup>2,†</sup>, Andreas Sternig<sup>2</sup>, Knut Müller<sup>3</sup>, Marco Schowalter<sup>3</sup>,  
Andreas Rosenauer<sup>3</sup>, Oliver Diwald<sup>2,\*</sup> and Lutz Mädler<sup>1,\*</sup>

<sup>1</sup> Institute of Materials Science (IWT), Department of Production Engineering, University of Bremen, Badgasteinerstraße 3, 28359 Bremen, Germany

<sup>2</sup> Institute of Particle Technology, Friedrich–Alexander University Erlangen–Nuremberg, Cauerstraße 4, 91058 Erlangen, Germany

<sup>3</sup> Institute of Solid State Physics, University of Bremen, Otto–Hahn–Allee 1, 28359 Bremen, Germany

<sup>†</sup> These authors contributed equally to this paper.

\* Corresponding authors: lmaedler@iwt.uni-bremen.de; o.diwald@lfg.uni-erlangen.de

### **Enclosure:**

Description for calculating the chemical formula of the periclase–phase solid–solution and three figures.

### Calculation of the chemical formula of the periclase-phase solid solution:

From Rietveld refinement, a weight percentage of the wurtzite phase of 5.9% is estimated. We assume the wurtzite phase consists of only ZnO, while the periclase phase contains both Zn and Mg. Starting with 0.3 mol of ZnO and 0.7 mol of MgO as determined by the precursor solution design, the mass of wurtzite ZnO is:

$$(0.3 \times 81.41 + 0.7 \times 40.30) \times 5.9\% = 3.11 \text{ (g)}$$

The rest of the total mass is in the periclase phase:

$$(0.3 \times 81.41 + 0.7 \times 40.30) \times 94.1\% = 49.53 \text{ (g)}$$

The molar ratio between Zn and Mg in the periclase phase is:

$$\left( \frac{0.3 \times 81.41 - 3.11}{81.41} \right) / 0.7 = 0.26 / 0.7$$

The formula of the periclase phase compound is:

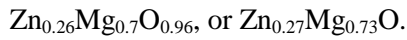

The formula weight of the periclase phase compound is then  $51.39 \text{ g mol}^{-1}$ .

Therefore, the molar ratio between the wurtzite and the periclase phase is:

$$\left( \frac{3.11}{81.41} \right) / \left( \frac{49.53}{51.39} \right) = 1/25$$

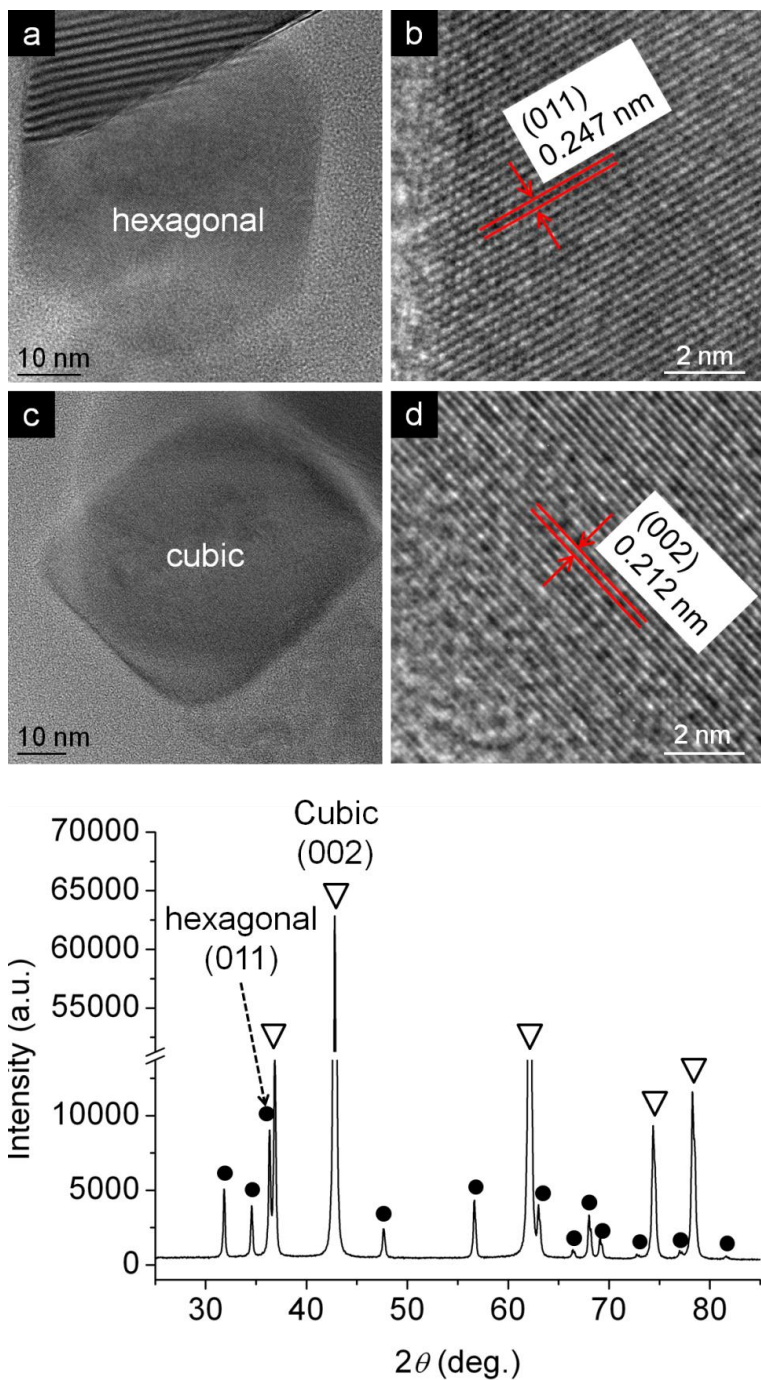

**Figure S1.** TEM images and XRD patterns showing different crystalline domains in the vacuum annealed  $\text{Zn}_{0.3}\text{Mg}_{0.7}\text{O}$  sample. The measured distances of 0.247 nm (b) and 0.212 nm (d) correspond to the (011) and (002)  $d$ -spacings in the hexagonal (a, b) and cubic (c, d) domains, respectively. The (011) and (002) planes correspond to the strongest reflections in the XRD patterns of the wurtzite (solid circles) and the periclase (empty triangles) phases.

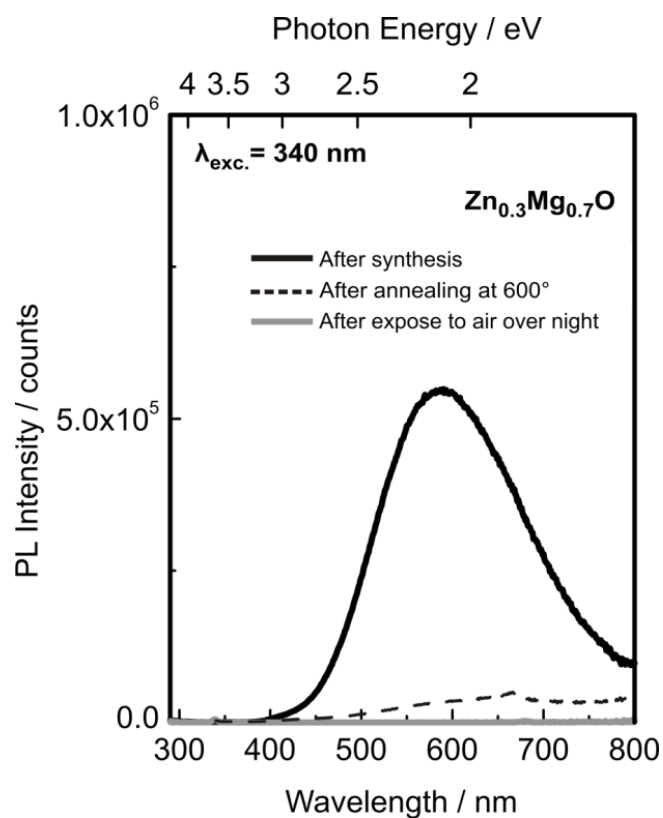

**Figure S2.** Effects of annealing and exposure to air/O<sub>2</sub> atmosphere on the PL emission properties of the  $\text{Zn}_{0.3}\text{Mg}_{0.7}\text{O}$  sample. The annealing time is 30 minutes.

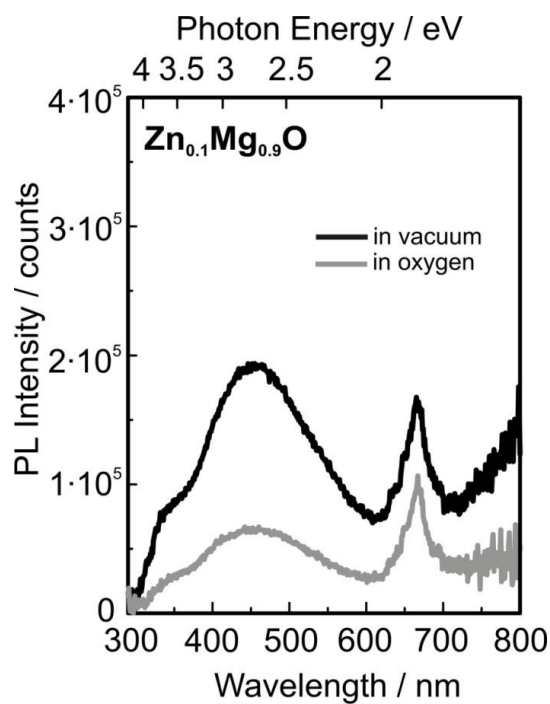

**Figure S3.** Room temperature photoluminescence emission spectra ( $\lambda_{\text{exc.}} = 340$  nm) of hydroxylated  $\text{Zn}_{0.1}\text{Mg}_{0.9}\text{O}$  nanoparticle powders after vacuum annealing and oxidation at  $T = 873$  K. Different to samples with entirely dehydroxylated particle surfaces molecular oxygen does not entirely quench the PL emission band at 2.8 eV which indicates that surface hydroxyls counteract energy transfer between photoexcited surface states and molecular oxygen.
